# Supplementary material for: Marxisms, socialisms, and communisms : an analysis and reformulation of economic development and comparative systems theories
Source: MDPI journal article supplement (doi:10.3390/gels9100813), 1987-01-01
Supplement: s1 [file s1]

**Supplementary information**  
**Injectable *in situ* crosslinking hydrogel for autologous fat grafting**

Kristin Oskarsdotter<sup>1</sup>, Catherine T. Nordgård<sup>2</sup>, Peter Apelgren<sup>1,3</sup>, Karin Säljö<sup>1,3</sup>, Anita A. Solbu<sup>2</sup>, Edwin Eliasson<sup>4</sup>, Sanna Sämfors<sup>4</sup>, Henriette E. M. Sætrang<sup>5</sup>, Lise Cathrine Asdahl<sup>5</sup>, Eric M. Thompson<sup>6,7</sup>, Christofer Troedsson<sup>6</sup>, Stina Simonsson<sup>8</sup>, Berit L. Strand<sup>2</sup>, Paul Gatenholm<sup>9</sup>, Lars Kölby<sup>1,3\*</sup>

<sup>1</sup> Department of Plastic Surgery, Institute of Clinical Sciences, Sahlgrenska Academy, University of Gothenburg, Gothenburg, Sweden

<sup>2</sup> NOBIPOL, Department of Biotechnology and Food Science, NTNU, Norway

<sup>3</sup> Region Västra Götaland, Sahlgrenska University Hospital, Department of Plastic Surgery, Gothenburg, Sweden

<sup>4</sup> Department of Chemistry and Chemical Engineering, Chalmers University of Technology, Gothenburg, Sweden

<sup>5</sup> DuPont Nutrition Norge AS d/b/a NovaMatrix, Norway (IFF H&N Norway from November 2023)

<sup>6</sup> Ocean TuniCell AS, N-5258 Blomsterdalen, Norway

<sup>7</sup> Department of Biological Sciences, University of Bergen, N-5006 Bergen, Norway

<sup>8</sup> Department of Medicinal Chemistry & Cell Biology, Institution of Biomedicine, Sahlgrenska University Hospital, Gothenburg

<sup>9</sup> CELLHEAL AS, Sandvika, Norway

**\* Corresponding author**

Lars Kölby MD, PhD

Professor of Plastic Surgery

University of Gothenburg, Institute for Clinical Sciences, Department of Plastic Surgery

Gröna stråket 8, Sahlgrenska University Hospital, SE-413 45 Gothenburg, Sweden

Tel.: +46-70-6451155

E-mail: lars.kolby@surgery.gu.se

**Abbreviations:** 3D; three dimensional; ALG; alginate solution; CMP; calcium carbonate microparticles; ETC; enzymatically pre-treated tunicate nanocellulose; LAT; lipoaspirate adipose tissue

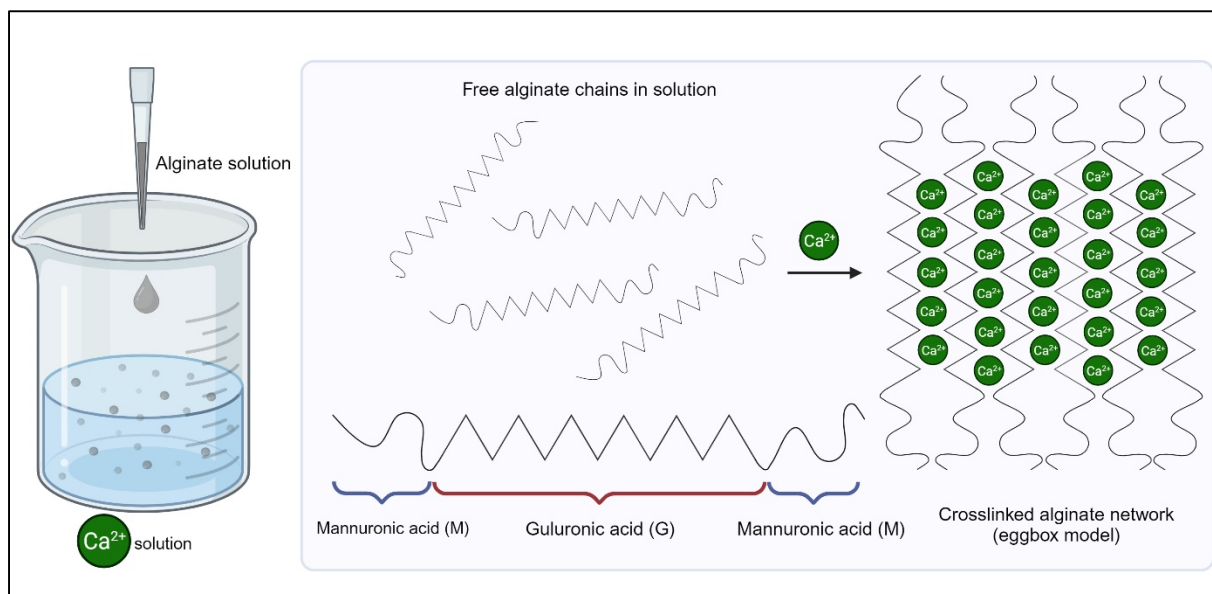

**Figure S1. Schematic illustration of the molecular structure of alginate and gelation mechanism.** The polysaccharide alginate are linear block copolymers consisting of linked mannuronic acid- and guluronic acid residues, denoted M and G-blocks. Alginate crosslinking can be achieved through addition of divalent cations such as  $\text{Ca}^{2+}$ . The crosslinking mechanism is believed to occur due to  $\text{Ca}^{2+}$  binding to the G-blocks of the alginate chain. Adjacent G-blocks of separate chains then form intermolecular junctions according to the eggbox model, creating a gel network. Figure created with BioRender.com.

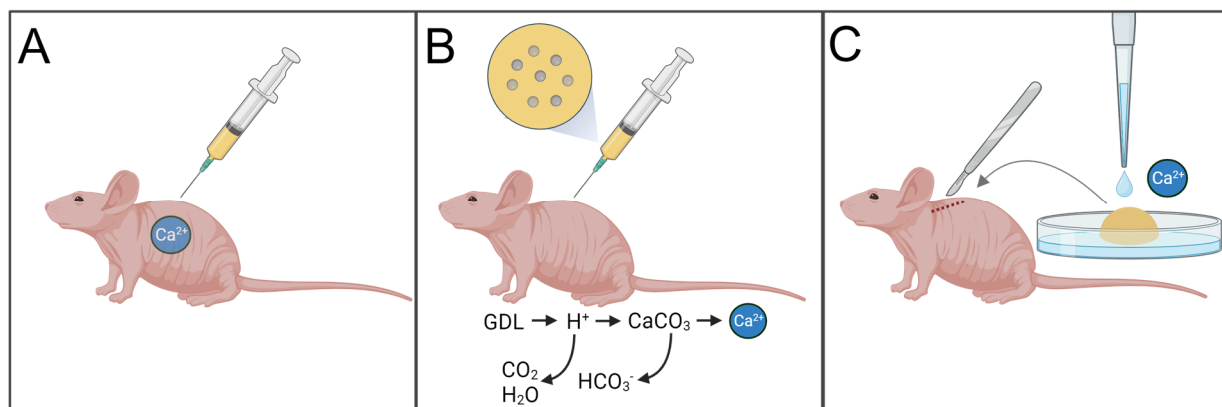

**Figure S2. Schematic illustration of the delivery and crosslinking mechanisms of LAT/ETC/ALG.** Three different  $\text{Ca}^{2+}$  delivery strategies were studied in a nude mouse model; injection and in situ crosslinking by physiologically available  $\text{Ca}^{2+}$  (A), injection of CMP-laden hydrogel and mechanism of  $\text{Ca}^{2+}$  release from CMP by GDL addition (B), and implantation of 3D bioprinted hydrogel grafts with  $\text{Ca}^{2+}$  supplied from an external source prior to implantation (C). Figure created with BioRender.com.
